# Supplementary material for: Visual sensors of an inverse opal hydrogel for the colorimetric detection of glucose
Source: Royal Society of Chemistry journal article supplement (doi:10.1039/c9tb00226j), 2019-01-01
Supplement: c9tb00226j1.pdf [file c9tb00226j1.pdf]

**Supporting information**

**The Visual Sensor of Inverse Opal hydrogel for the Colorimetric  
Detection of Glucose**

Xianqi Feng,<sup>\*a</sup> Jun Xu,<sup>b</sup> Yanxia Liu<sup>a</sup> and Wenpeng Zhao<sup>\*b</sup>

- a. Advanced Research Institute for Multidisciplinary Science, Qilu University of Technology (Shandong Academy of Sciences), Jinan, 250353, P.R. China.
- b. School of Chemical Engineering, Qingdao University of Science and Technology, Qingdao, 266042, P. R. China

\*Email - qust-fengxianqi@163.com

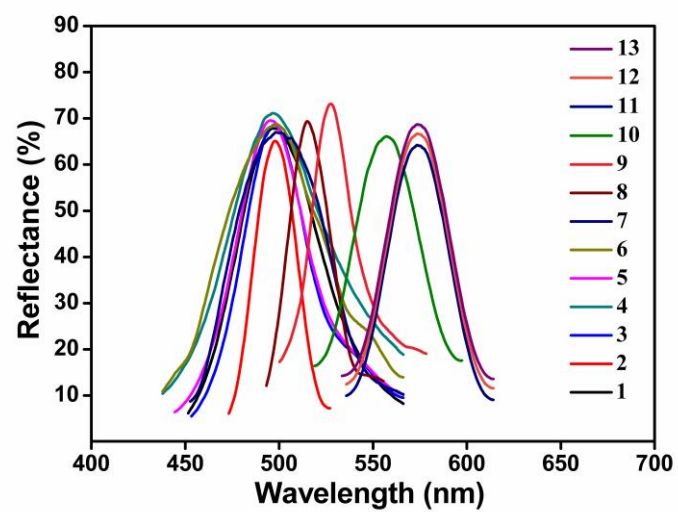

**Figure S1.** The shift of diffraction peak of AP-52 gels in CHES buffer solutions with different pH values.

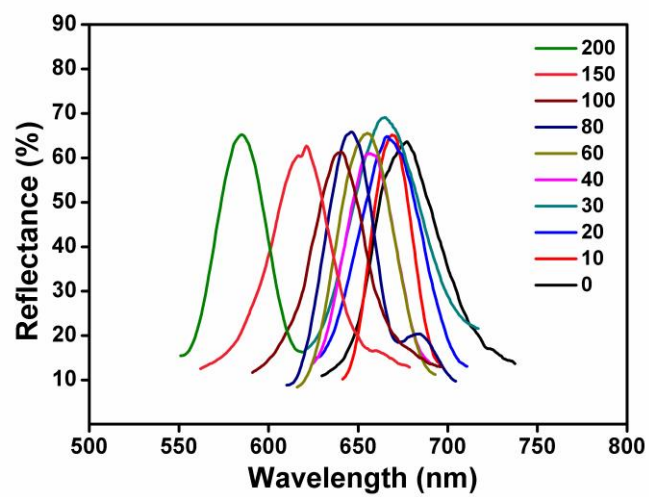

**Figure S2.** The shift of diffraction peak of AP-52 gels in CHES buffer solutions with different ionic strength.

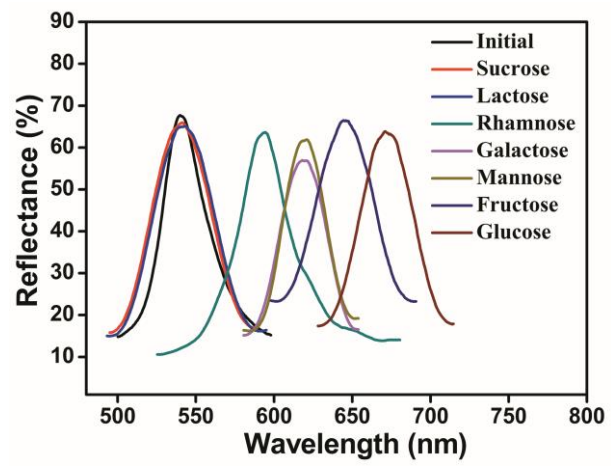

**Figure S3.** The shift of diffraction peak of AP-52 gels in different carbohydrate solutions.
